# Supplementary material
Source: Research Square preprint supplement (doi:10.21203/rs.3.rs-9451861/v1)

**Supplemental information**

In this study, we assumed the majority of fireflies captured were *Photinus pyralis*, which was corroborated by independent citizen science data: within a 50km radius of the study site during the sampling months of June, July and August, 8 species of firefly had been detected since 2010, but *P. pyralis* was by far the most common species (251 of 419 observations, 60% of observations, with the next most common species *Lucidota atra* representing just 8% of the captures58.

**Supplementary Fig. S1**: *Seasonal patterns in adult firefly captures relative to time and thermal accumulation.* Shown are weekly mean adult firefly captures per trap across the growing season for the two study periods (colored by study). A, Adult captures plotted against calendar week; B, adult captures plotted against cumulative degree‑day accumulation. Points represent weekly averages pooled across traps, and smooth curves indicate by-study-period trends fit for visualization.


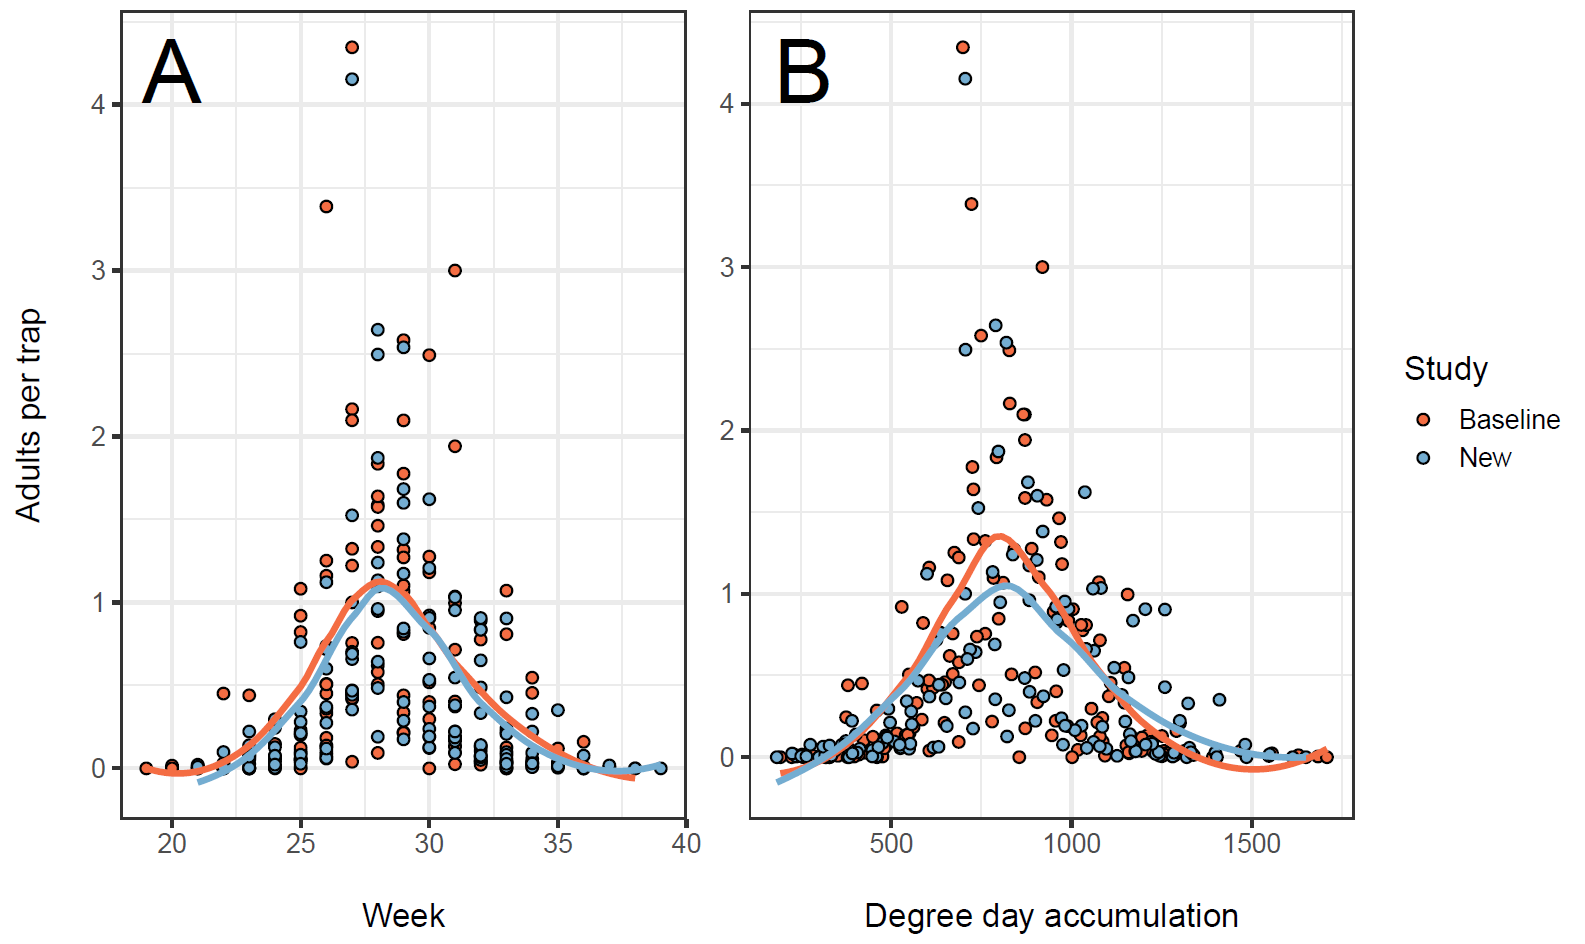

Supplement: Supplementary file 1 [file 421accecd6c328a3ebf815f2.docx]
